# Supplementary material for: A universal strategy for fabrication and morphology control of polyoxometalate-based metal–organic frameworks
Source: Royal Society of Chemistry journal article supplement (doi:10.1039/c9cc09554c), 2020-01-01
Supplement: c9cc09554c1.pdf [file c9cc09554c1.pdf]

## Supporting Information for

# **A Universal Strategy for Fabrication and Morphology Control of Polyoxometalate-Based Metal–Organic Frameworks**

Xiao-Hui Li,<sup>‡</sup> Yi-Wei Liu,<sup>‡</sup> Ying Lu,<sup>\*</sup> Zhong Zhang, Hong-Rui Tian, Shu-Mei Liu and Shu-Xia Liu<sup>\*</sup>

Key Laboratory of Polyoxometalate Science of the Ministry of Education,  
College of Chemistry, Northeast Normal University,  
Changchun, Jilin 130024, China

\*e-mail: liusx@nenu.edu.cn; luy968@nenu.edu.cn

## Table of Contents

|                                                                                     |     |
|-------------------------------------------------------------------------------------|-----|
| 1. Experimental Details                                                             | S3  |
| 2. Single-crystal structure of NENU-n                                               | S6  |
| 3. Characterization of original Cu substrates                                       | S6  |
| 4. Synthesis process of NENU-9 on Cu foil                                           | S7  |
| 5. UV-Vis measure of formed HPB                                                     | S7  |
| 6. Characterization of as-synthesized NENU-9 on Cu foil                             | S8  |
| 7. Thickness of NENU-9 on Cu foil                                                   | S9  |
| 8. Schematic diagram of the formation process of NENU-n                             | S10 |
| 9. Structure characterization of as-synthesized NENU-n encapsulating different POMs | S11 |
| 10. Structure characterization of as-synthesized Cu-BDC on Cu foil                  | S12 |
| 11. Particle size of NENU-9 synthesized on Cu foil                                  | S13 |
| 12. Morphology of NENU-n encapsulating different POMs                               | S13 |
| 13. Morphology of NENU-9 produced at different reaction time                        | S14 |
| 14. Characterization of NENU-9 produced on Cu wire at different reaction time       | S15 |
| 15. Characterization of NENU-9 produced on Cu powder at different reaction time     | S15 |
| 16. Characterization of NENU-9 produced on Cu mesh at different reaction time       | S15 |
| 17. Morphology of NENU-n produced with copper salt as the metal source              | S16 |
| References                                                                          | S16 |

## 1. Experimental Procedures

### Materials

All the raw chemicals were obtained commercially and used without additional purification.  $\text{H}_4\text{PVMo}_{11}\text{O}_{40}$  ( $\text{PVMo}_{11}$ ),  $\text{H}_5\text{PV}_2\text{Mo}_{10}\text{O}_{40}$  ( $\text{PV}_2\text{Mo}_{10}$ ),  $\text{H}_6\text{PV}_3\text{Mo}_9\text{O}_{40}$  ( $\text{PV}_3\text{Mo}_9$ ),  $\text{H}_4\text{SiMo}_{12}\text{O}_{40}$  ( $\text{SiMo}_{12}$ ),  $\text{H}_3\text{PMo}_{12}\text{O}_{40}$  ( $\text{PMo}_{12}$ ),  $\text{H}_5\text{SiVMo}_{11}\text{O}_{40}$  ( $\text{SiVMo}_{11}$ ) and  $\text{Cu}_3(\text{BTC})_2$  were synthesized according to the procedure described in the literatures<sup>1-4</sup> and characterized by FTIR spectra (Fig. S5 and S11a).

### Characterization

Fourier transform infrared (FTIR) spectra were recorded in the range 400-4000  $\text{cm}^{-1}$  on an Alpha Centaur FTIR spectrophotometer using KBr pellets. Powder X-ray diffraction (PXRD) measurements were performed on a Rigaku Smartlab system with Cu  $K\alpha$  radiation in the angular range  $2\theta$  5°-60° at 293 K. Scanning electron microscope (SEM) images were collected using a HITACHI SU8010 scanning electron microscope. UV-Vis spectra were recorded with a UV-6100 Double Beam spectrophotometer. Hiden isochema IGA 100B instrument was used to measure  $\text{N}_2$  sorption at 77 K. The thickness of the crystalline NENU-9 layers growing on Cu foil was measured through subtracting the thickness of Cu foil from that of whole material (NENU-9 layers together with Cu substrate) by a digital caliper. Elemental analyses for Cu, P, Si and Mo were determined using a Leaman inductively coupled plasma (ICP) spectrometer.

### Synthesis of NENU-9 on Cu foil

In a typical experiment,  $\text{PV}_2\text{Mo}_{10}$  (0.4 g, 0.16 mmol) was dissolved in 3 mL distilled water (solution A).  $\text{H}_3\text{BTC}$  (0.28 g, 1.33 mmol) was dissolved in 12 mL ethanol (solution B). A solution and B solution were uniformly mixed, then 20% NaOH aqueous solution (40  $\mu\text{L}$ ) was added into the mixed solution with continuous stirring to prepare the precursor solution. The precursor solution and a Cu foil (1 cm  $\times$  1 cm  $\times$  20  $\mu\text{m}$ ) were then sealed in a Teflon-lined autoclave and heated at 100 °C for rated time, followed by cooling to room temperature. Then solution was removed and the product was dried in air.

### Synthesis of NENU-n encapsulating different Keggin-type POMs on Cu foil

SiMo<sub>12</sub> (0.4 g), SiVMo<sub>11</sub> (0.4 g), PV<sub>3</sub>Mo<sub>9</sub> (0.4 g), PVMo<sub>11</sub> (0.4 g) and PMo<sub>12</sub> (0.4 g) were respectively dissolved in 3 mL distilled water. The subsequent process was the same as the synthesis of NENU-9 on Cu foil. After reacting at 100 °C for 1 h, the corresponding products were obtained separately.

#### **Synthesis of cubic NENU-9 on Cu wire**

The process was similar to the synthesis of NENU-9 on Cu foil, but a Cu wire (1 cm length, 200 μm diameter) was immersed in the precursor solution. After reacting at 100 °C for 30 min, cubic NENU-9 crystals growing on Cu wire were obtained.

#### **Synthesis of cubic NENU-9 on Cu mesh**

The process was similar to the synthesis of NENU-9 on Cu foil, but Cu mesh (50 μm wire diameter, about 75 μm holes) was immersed in the precursor solution. After reacting at 100 °C for 2 h, cubic NENU-9 growing on Cu mesh was obtained.

#### **Synthesis of cubic NENU-9 on Cu powder**

The process was similar to the synthesis of NENU-9 on Cu foil, but Cu powder (200 mesh, 0.2 g) was immersed in the precursor solution. After reacting at 100 °C for 30 min, cubic NENU-9 was obtained.

#### **Synthesis of Cu-BDC on Cu foil**

PV<sub>2</sub>Mo<sub>10</sub> (0.2 g, 0.08 mmol) was dissolved in 5 mL distilled water (solution A). H<sub>2</sub>BDC (0.1 g, 0.6 mmol) was dissolved in 10 mL DMF (solution B). A solution and B solution were uniformly mixed, and then 20% NaOH aqueous solution (80 μL) was added into the mixed solution with continuous stirring. Then a precursor solution was obtained after removing precipitation by filtration. The precursor solution and a Cu foil (1 cm × 1 cm × 20 μm) were then sealed in a Teflon-lined autoclave and heated at 100 °C for 12 h, followed by cooling to room temperature. Then solution was removed and the product was washed with ethanol and dried in air.

#### **Synthesis of NENU-n with copper salt as the metal source**

In a typical experiment, PV<sub>2</sub>Mo<sub>10</sub> (0.4 g, 0.16 mmol) and Cu(NO<sub>3</sub>)<sub>2</sub>·3H<sub>2</sub>O (0.4 g, 1.7 mmol) were dissolved in 3 mL distilled water and then 20% NaOH aqueous solution (60 μL) was added to prepare the solution A. H<sub>3</sub>BTC (0.28 g, 1.33 mmol) was dissolved in 12 mL ethanol (solution B). Solution B was added into solution A with continuous stirring to prepare the precursor solution. The precursor solution was then sealed in a Teflon-lined autoclave and heated at 100 °C

for 1 h. Then NENU-9 was obtained after cooling to room temperature. Other NENU-n crystals were prepared by the same method but different POMs.

## 2. Single-crystal structure of NENU-n

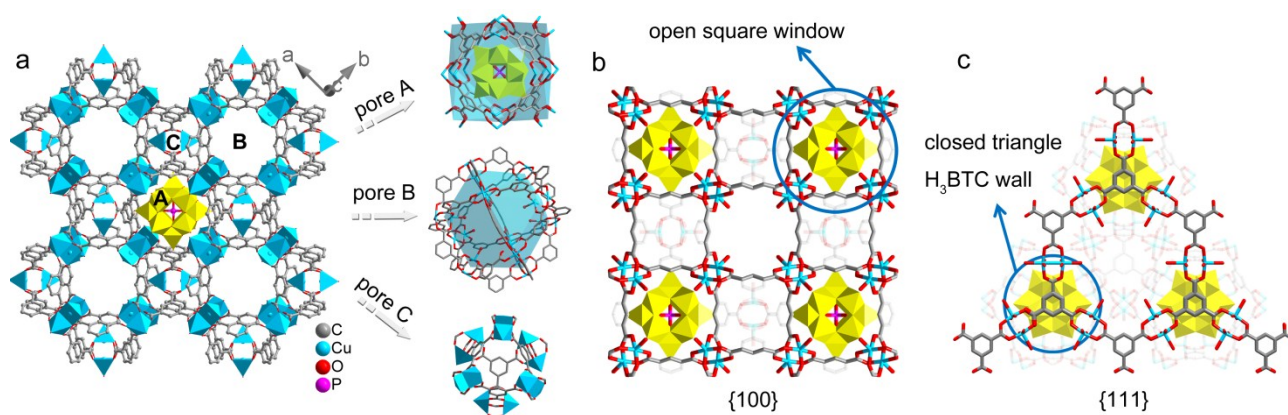

**Fig. S1** (a) The structure diagram of NENU-n with three kinds of pores. (b) The surface structure of {100} facets with open square windows and (c) the surface structure of {111} facets with closed triangle H<sub>3</sub>BTC walls in NENU-n.

As reported in our previous work,<sup>5,6</sup> NENU-n, formulated as  $[\text{Cu}_{12}(\text{BTC})_8(\text{H}_2\text{O})_{12}][\text{H}_n\text{XV}_x\text{M}_{12-x}\text{O}_{40}]$  ( $X = \text{Si, Ge, P, As; M} = \text{W, Mo; } x = 0, 1, 2, 3$ ), are a series of crystalline compounds made up of  $\text{Cu}_3(\text{BTC})_2$  as the scaffold and encapsulating a Keggin-type POM in each pore A of  $\text{Cu}_3(\text{BTC})_2$  scaffold. There are three kinds of pores in the framework (pore A, B and C). Pore A has a larger free diameter (13 Å) and narrower square window (10 Å) which can fitly encapsulate a Keggin-type POM molecule (10.4 Å diameter). Thus, leaching out of the POM from the pore A of NENU-n is difficult. Pore B (10 Å) and pore C (5 Å) form channels that can be used for the transport of substrates in catalysis.

## 3. Characterization of original Cu substrates

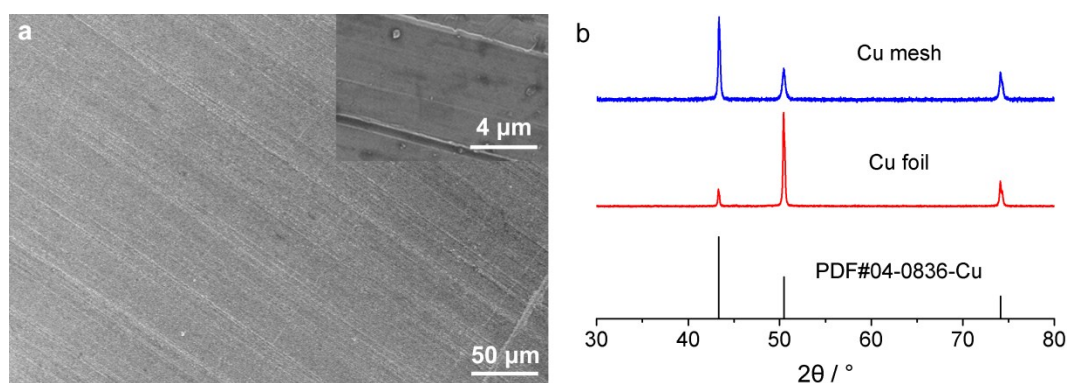

**Fig. S2** (a) SEM images of original Cu foil. (b) PXRD patterns of simulated Cu and original Cu substrates (Cu foil and Cu mesh).

#### 4. Synthesis process of NENU-9 on Cu foil

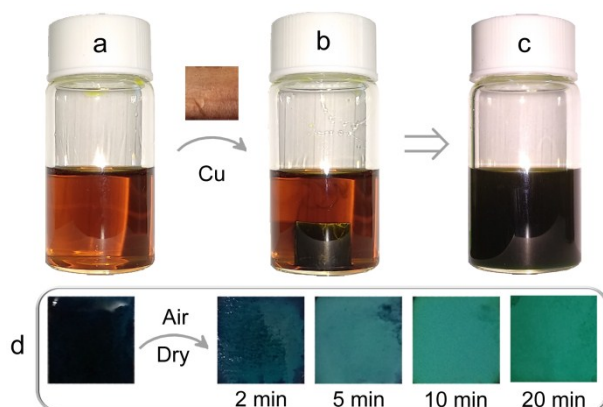

**Fig. S3** The synthesis process of NENU-9 on Cu foil. (a) Photograph of the precursor solution prepared by mixing  $PV_2Mo_{10}$  aqueous solution and ethanol solution of  $H_3BTC$ . (b) Photograph of the solution just after a Cu foil was immersed in. (c) The solution after reacting for 1 h at 100 °C. (d) Drying process of the synthesized NENU-9 on Cu foil in air.

#### 5. UV-Vis measure of formed HPB

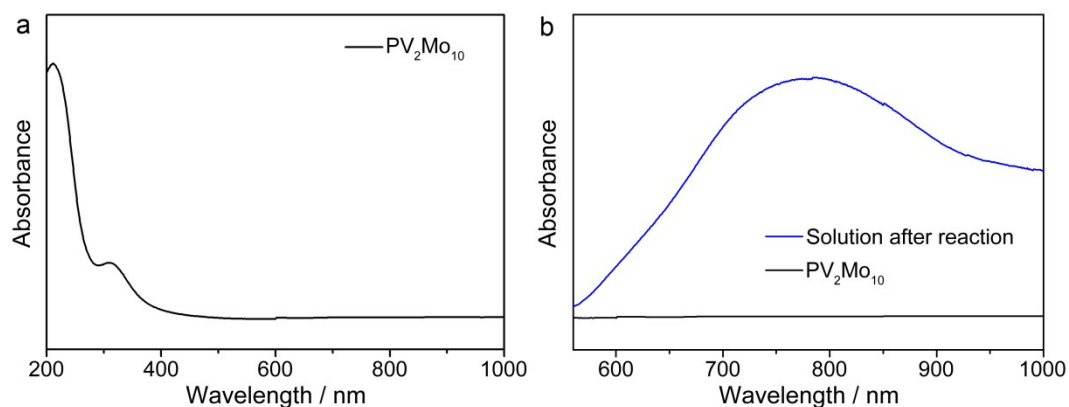

**Fig. S4** UV-Vis spectrum of (a)  $PV_2Mo_{10}$  in the mixed solution of ethanol and water (v:v = 4:1) and (b) the solution after the fabrication reaction of NENU-9 proceeded for 1 h.

A broad peak centered at  $\sim 780$  nm was appeared in the UV-Vis spectrum of the solution after the fabrication reaction of NENU-9, which is a characteristic peak belong to HPB,<sup>7</sup> indicating the formation of HPB in during the preparation of NENU-9.

## 6. Characterization of as-synthesized NENU-9 on Cu foil

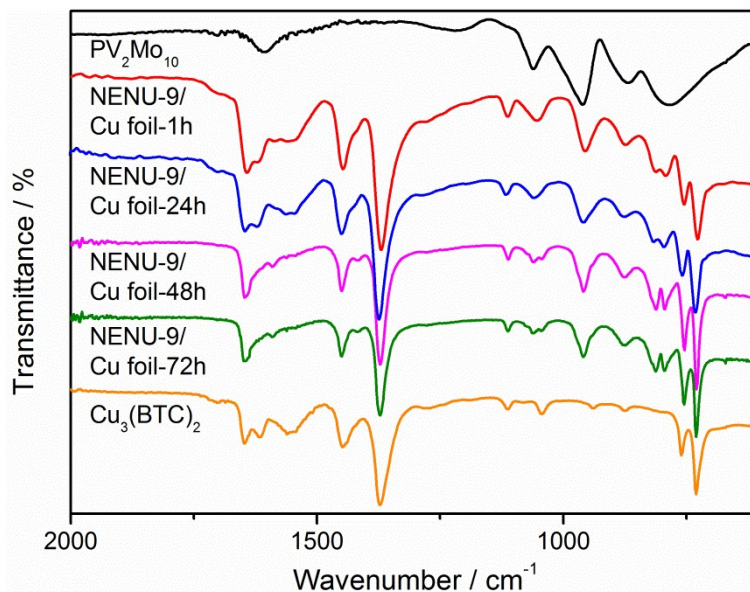

**Fig. S5** FTIR spectra of PV<sub>2</sub>Mo<sub>10</sub> and as-synthesized NENU-9 on Cu foil.

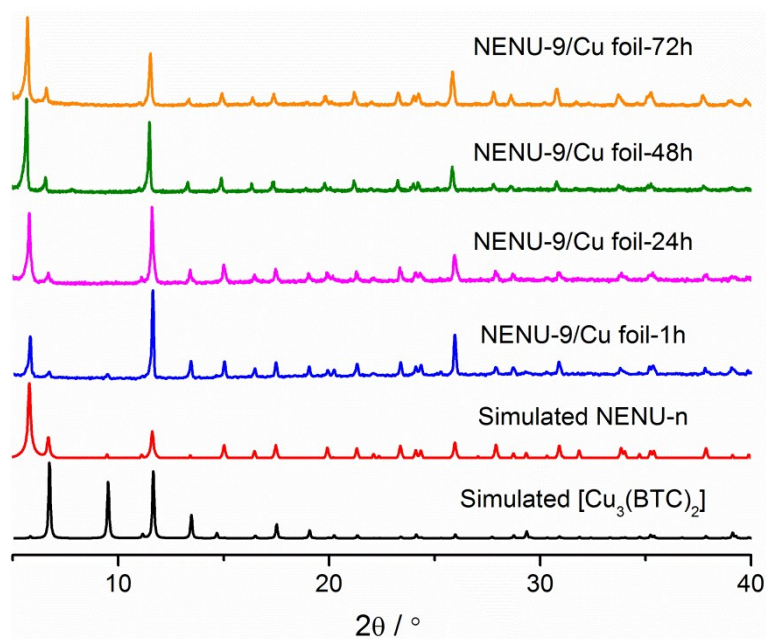

**Fig. S6** PXRD patterns of as-synthesized NENU-9 on Cu foil and simulated NENU-n (the data of NENU-n crystal was obtained from our previous work<sup>5</sup>).

The IR characteristic peaks of Keggin-type POMs in the range of 600-1100 cm<sup>-1</sup> indicated the encapsulation of POMs in Cu<sub>3</sub>(BTC)<sub>2</sub> scaffold. The PXRD peak at 2θ = 9.5° is a characteristic diffraction peak to distinguish whether there is Cu<sub>3</sub>(BTC)<sub>2</sub> framework unloading POM.<sup>6</sup> No peak at 2θ = 9.5° was observed in the PXRD patterns of materials prepared on Cu foil at 100 °C, indicating that there was no Cu<sub>3</sub>(BTC)<sub>2</sub> unloading POM. In addition, the ratio of Cu:P:Mo for NENU-



9 was 12:1:10 as determined by ICP analysis (Table S1), which was consistent with the molecular formula of NENU-9 ( $[\text{Cu}_{12}(\text{BTC})_8(\text{H}_2\text{O})_{12}][\text{H}_5\text{PV}_2\text{Mo}_{10}\text{O}_{40}]$ ). All these results proved the generation of pure phase NENU-9.

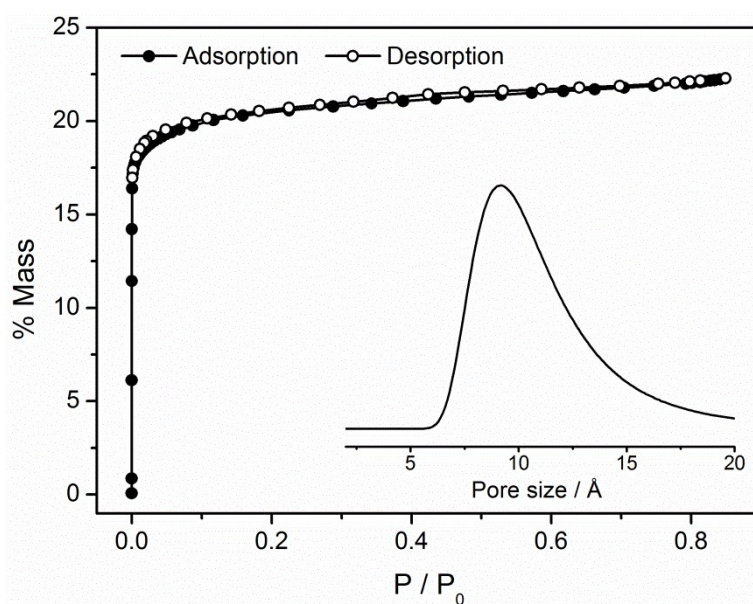

**Fig. S7**  $\text{N}_2$  sorption isotherms and pore size distribution of as-synthesized NENU-9 on Cu foil at 100 °C for 1 h.

$\text{N}_2$  sorption analysis of as-synthesized NENU-9 manifested the microporosity with a pore size of 9 Å and a BET surface area of  $549 \text{ m}^2 \text{ g}^{-1}$ , which were close to the values of previously reported NENU-9.<sup>6</sup>

## 7. Thickness of NENU-9 on Cu foil

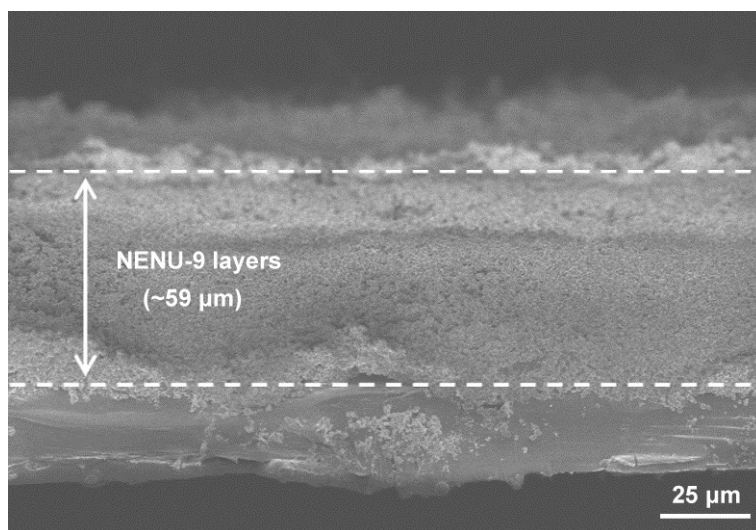

**Fig. S8** Cross-sectional SEM image of synthesized NENU-9 on Cu foil at 100 °C for 1 h.

After reacting at 100 °C for 1 h, the thickness of the crystalline NENU-9 layers growing on Cu foil was about 59 μm as shown in cross-sectional SEM image, which was consistent with the result that measured through subtracting the thickness

of Cu foil from that of the whole material (NENU-9 layers together with Cu substrate) by a digital caliper (60  $\mu\text{m}$ ). The thickness of NENU-9 layers prepared at 100  $^{\circ}\text{C}$  for longer time was only measured by a digital caliper due to the significant fragility of thick crystal layers.

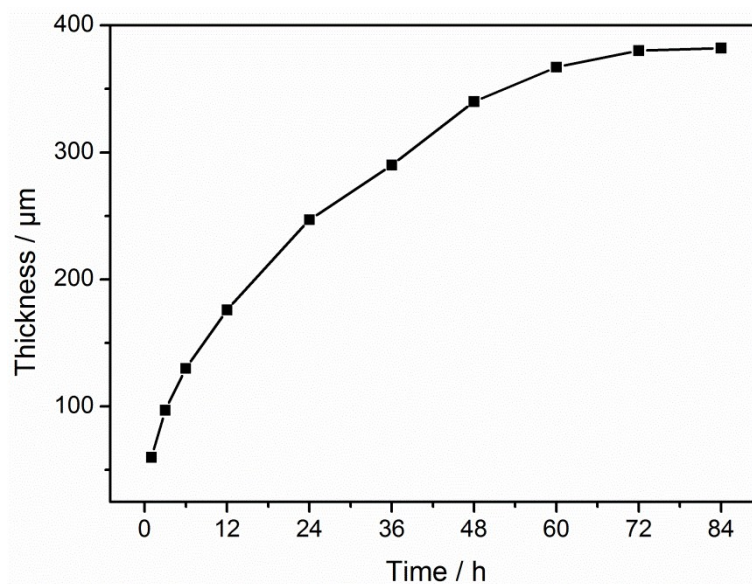

**Fig. S9** The thickness of NENU-9 produced on Cu foil at 100  $^{\circ}\text{C}$  for different reaction time.

## 8. Schematic diagram of the formation process of NENU-n

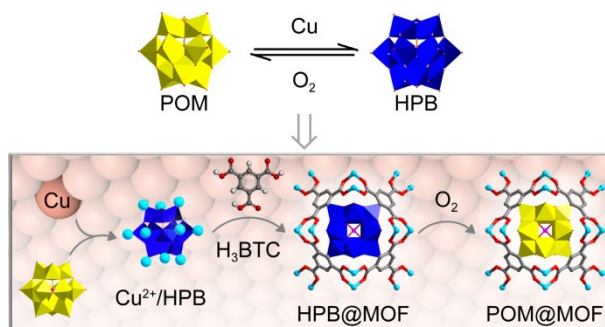

**Fig. S10** Schematic diagram of the formation process of NENU-n by utilizing the oxidization of POMs to Cu.

## 9. Structure characterization of as-synthesized NENU-n encapsulating different POMs

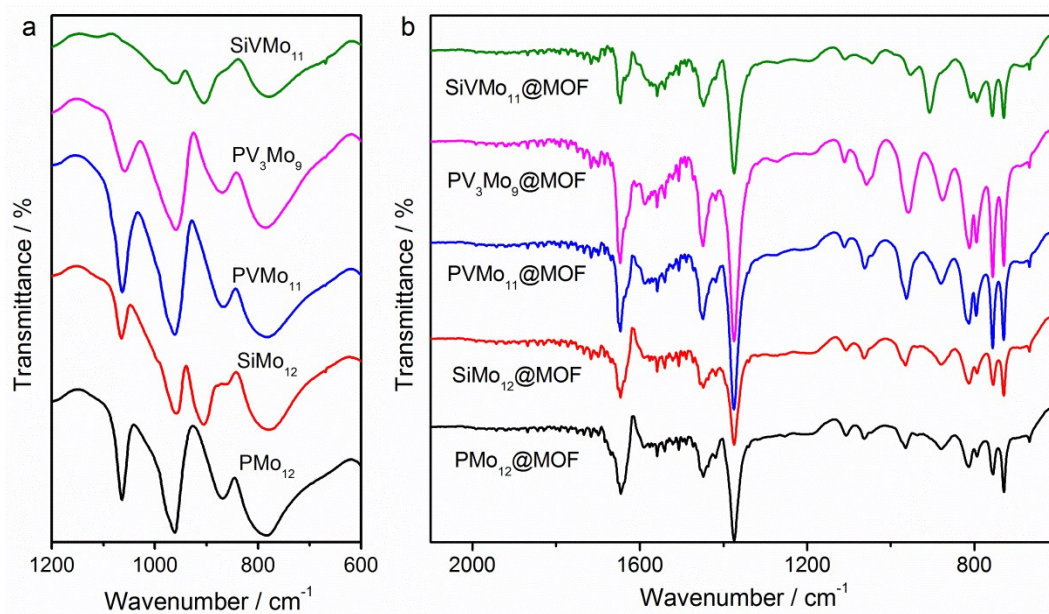

**Fig. S11** FTIR spectra of (a) as-synthesized Keggin-type POMs with different negative charges and (b) corresponding POM@MOFs.

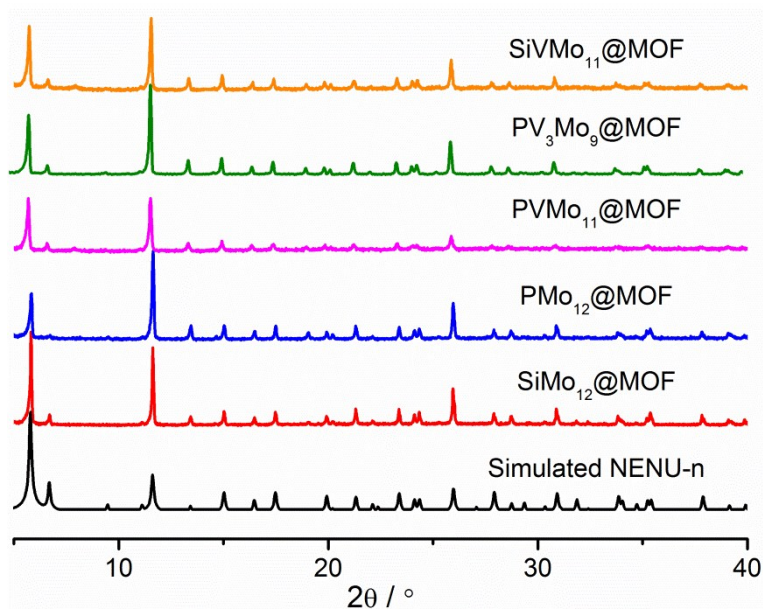

**Fig. S12** PXRD patterns of NENU-n encapsulating Keggin-type POMs with different negative charges and simulated NENU-n.

**Table S1** The element contents of as-synthesized NENU-n by ICP analysis.

| Sample                                | $n_{\text{Cu}} / \mu\text{mol mL}^{-1}$ | $n_{\text{P}} / \mu\text{mol mL}^{-1}$ | $n_{\text{Si}} / \mu\text{mol mL}^{-1}$ | $n_{\text{Mo}} / \mu\text{mol mL}^{-1}$ | Cu:P(Si):Mo |
|---------------------------------------|-----------------------------------------|----------------------------------------|-----------------------------------------|-----------------------------------------|-------------|
| PMo <sub>12</sub> @MOF                | 0.907                                   | 0.075                                  | --                                      | 0.901                                   | 12:1:12     |
| SiMo <sub>12</sub> @MOF               | 0.616                                   | --                                     | 0.050                                   | 0.619                                   | 12:1:12     |
| PVMo <sub>11</sub> @MOF               | 0.672                                   | 0.056                                  | --                                      | 0.615                                   | 12:1:11     |
| PV <sub>2</sub> Mo <sub>10</sub> @MOF | 0.835                                   | 0.070                                  | --                                      | 0.692                                   | 12:1:10     |
| PV <sub>3</sub> Mo <sub>9</sub> @MOF  | 0.979                                   | 0.082                                  | --                                      | 0.739                                   | 12:1:9      |
| SiVMo <sub>11</sub> @MOF              | 0.695                                   | --                                     | 0.057                                   | 0.637                                   | 12:1:11     |

Similar to the results of NENU-9, FTIR spectra of as-synthesized NENU-n indicated the encapsulation of POMs in Cu<sub>3</sub>(BTC)<sub>2</sub> scaffold. All samples were detected by PXRD and there were no peaks at  $2\theta = 9.5^\circ$ , indicating the pure-phase NENU-n. In addition, the ratio of POM-to-MOF for all synthesized NENU-n was determined by ICP analysis. The results showed that the molar ratio of Cu:P (or Si) was all 12:1, which is consistent with the molecular formula of NENU-n, further proving the generation of pure phase NENU-n.

## 10. Structure characterization of as-synthesized Cu-BDC on Cu foil

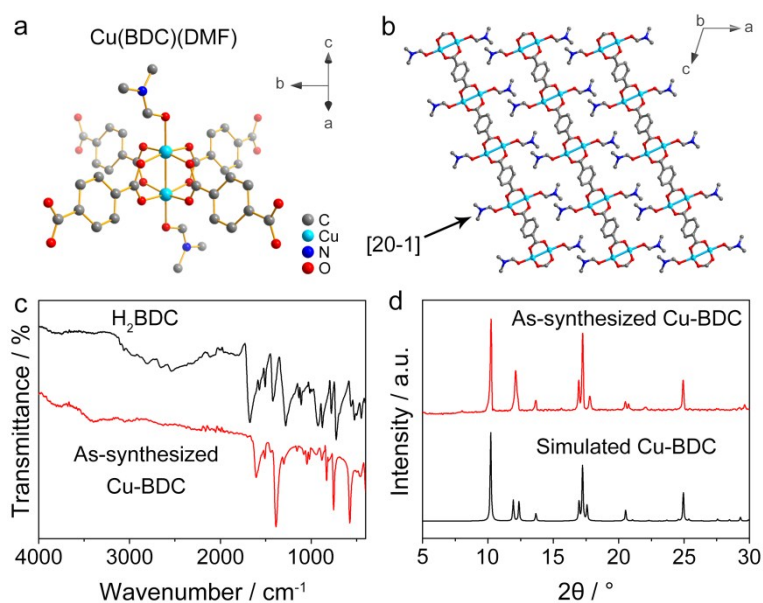

**Fig. S13** (a) The structure diagram of dicopper paddle-wheel building unit in Cu-BDC. (b) The stacking of lamellar structures of Cu-BDC along [20-1] axis. (c) FTIR spectra of H<sub>2</sub>BDC and as-synthesized Cu-BDC on Cu foil. (d) PXRD patterns of as-synthesized Cu-BDC on Cu foil and simulated Cu-BDC (the data of Cu-BDC crystal was obtained from the reported work<sup>8</sup>).

Cu-BDC ([Cu(BDC)(DMF)], H<sub>2</sub>BDC = 1,4-benzenedicarboxylic acid) is composed of Cu<sup>II</sup> atoms coordinating with



BDC linkers on {20-1} crystallographic planes to form 2D layers with a interlayer distance of 5.2 Å. In this system, POM is unlikely to be loaded in synthesized Cu-BDC due to the larger diameter of POM (10.4 Å). Thus, a pure Cu-BDC was formed, as confirmed by FTIR spectra and PXRD patterns.

## 11. Particle size of NENU-9 synthesized on Cu foil

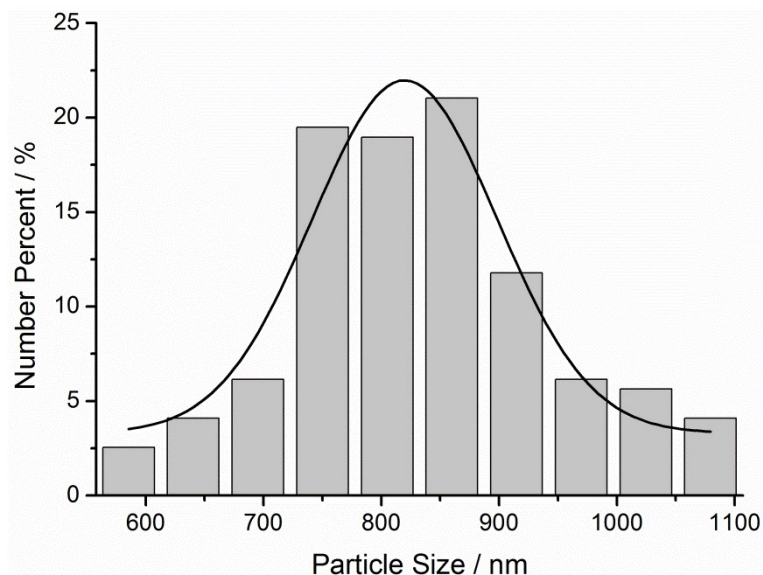

Fig. S14 Particle size analysis of NENU-9 crystal synthesized on Cu foil at 100 °C for 1 h.

## 12. Morphology of NENU-n encapsulating different POMs

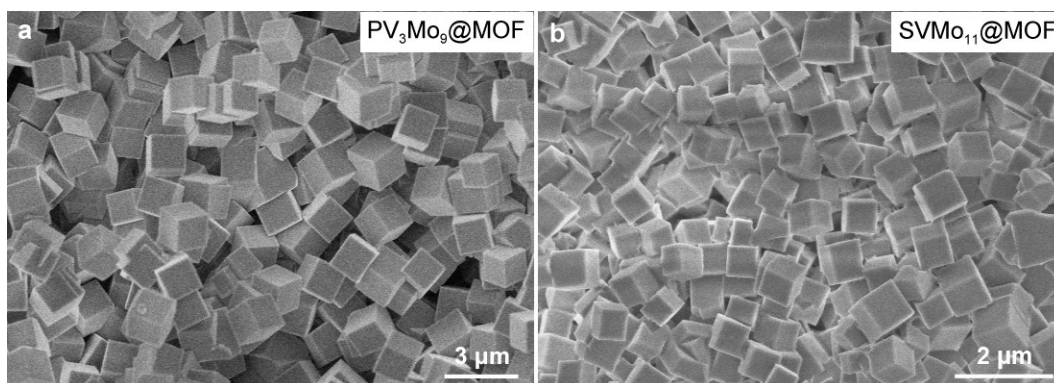

Fig. S15 SEM images of (a) PV<sub>3</sub>Mo<sub>9</sub>@MOF and (b) SiVMo<sub>11</sub>@MOF.

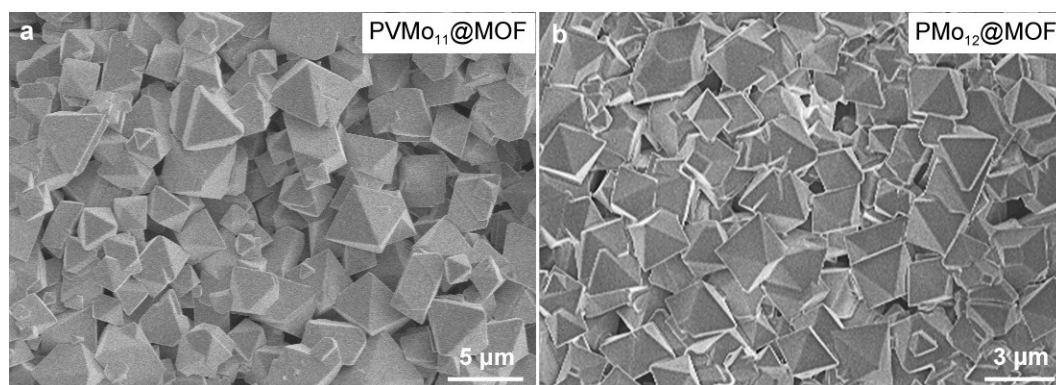

**Fig. S16** SEM images of (a) PVMo<sub>11</sub>@MOF and (b) PMo<sub>12</sub>@MOF.

### 13. Morphology of NENU-9 produced at different reaction time

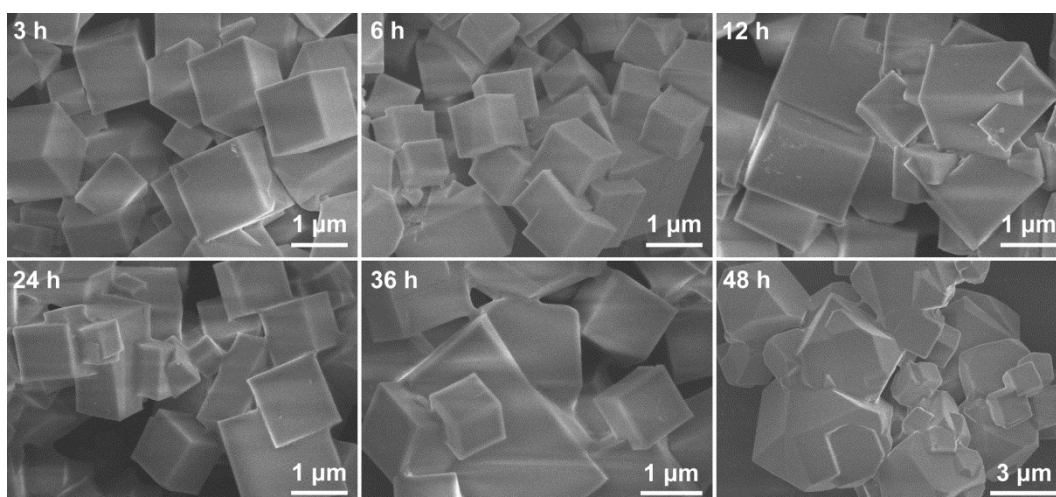

**Fig. S17** SEM images of NENU-9 produced on Cu foil at 100 °C for different reaction time.

As the reaction time increased, the thicker NENU-9 layer was formed, even a thickness of hundreds micrometer. The large thickness and poor conductivity of NENU-9 made the sample particles easily flying by electron beams and pictures unclear during the SEM test. We used a conductive adhesive to paste the sample on the surface of NENU-9 layer at different reaction times and then the conductive adhesive was pasted on the sample stage for testing. Therefore, the morphology of NENU-9 on top was clearly detected and a morphologic change from cube to cuboctahedra was observed after 48 h.

#### 14. Characterization of NENU-9 produced on Cu wire at different reaction time

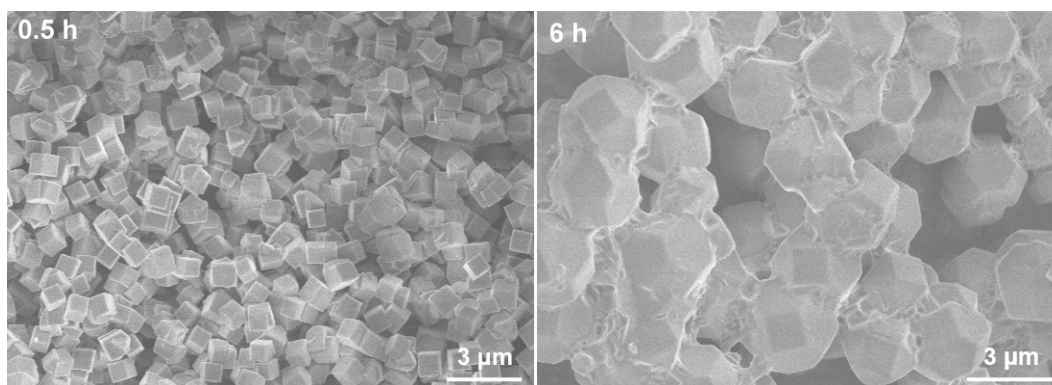

Fig. S18 SEM images of NENU-9 obtained on Cu wire within 0.5 h and 6 h.

#### 15. Characterization of NENU-9 produced on Cu powder at different reaction time

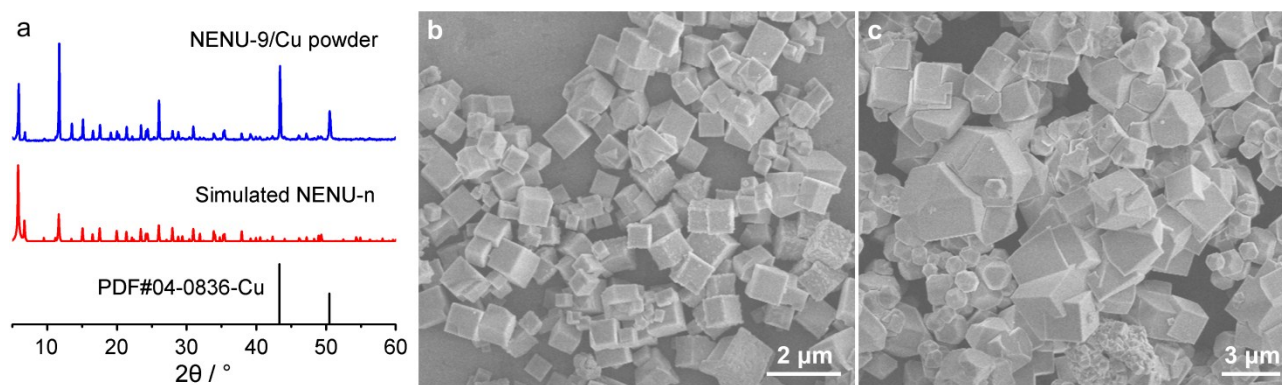

Fig. S19 (a) PXRD patterns NENU-9 obtained on Cu powder within 0.5 h. (b, c) SEM images of NENU-9 obtained on Cu powder within 0.5 h (b) and 6 h (c).

#### 16. Characterization of NENU-9 produced on Cu mesh at different reaction time

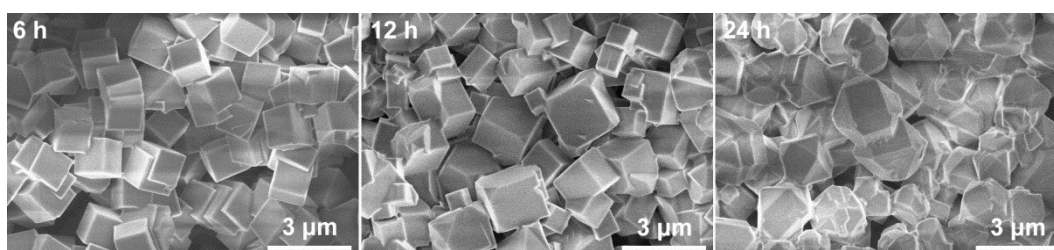

Fig. S20 SEM images of NENU-9 obtained on Cu mesh at different reaction time.

## 17. Morphology of NENU-n produced with copper salt as the metal source

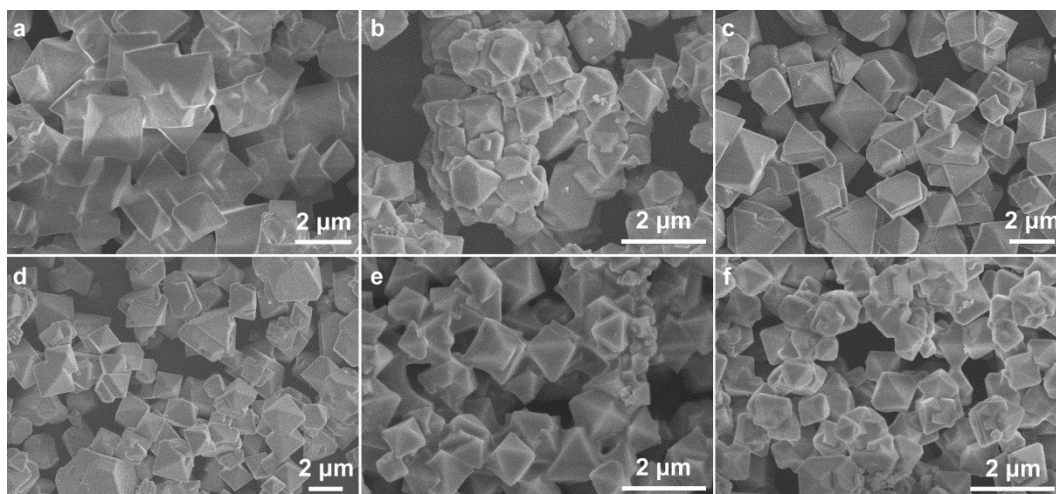

**Fig. S21** SEM images of NENU-n obtained with  $\text{Cu}(\text{NO}_3)_2$  as the metal source after reacting at 100 °C for 1 h. (a)  $\text{SiVMo}_{11}@MOF$ , (b)  $\text{PV}_3\text{Mo}_9@MOF$ , (c)  $\text{PV}_2\text{Mo}_{10}@MOF$ , (d)  $\text{PVMo}_{11}@MOF$ , (e)  $\text{SiMo}_{12}@MOF$  and (f)  $\text{PMo}_{12}@MOF$ .

## References

1. G. A. Tsigdinos and C. J. Hallada, *Inorg. Chem.*, 1968, **7**, 437-441.
2. C. Rocchiccioli-Deltcheff, M. Fournier, R. Franck and R. Thouvenot, *Inorg. Chem.*, 1983, **22**, 207-216.
3. N. N. Chumachenko, R. I. Maksimovskaya, D. V. Tarasova, E. N. Yurchenko and I. V. Yaroslavtseva, *Kinet. Catal.*, 1984, **25**, 553-557.
4. S. S.-Y. Chui, S. M.-F. Lo, J. P. H. Charmant, A. G. Orpen and I. D. Williams, *Science*, 1999, **283**, 1148-1150.
5. C.-Y. Sun, S.-X. Liu, D.-D. Liang, K.-Z. Shao, Y.-H. Ren and Z.-M. Su, *J. Am. Chem. Soc.*, 2009, **131**, 1883-1888.
6. Y. Liu, S. Liu, S. Liu, D. Liang, S. Li, Q. Tang, X. Wang, J. Miao, Z. Shi and Z. Zheng, *Chemcatchem*, 2013, **5**, 3086-3091.
7. M. T. Pope, *Heteropoly and Isopoly Oxometalates*, Springer-Verlag, New York, 1983.
8. C. G. Carson, K. Hardcastle, J. Schwartz, X. Liu, C. Hoffmann, R. A. Gerhardt and R. Tannenbaum, *Eur. J. Inorg. Chem.*, 2009, 2338-2343.
